# Supplementary material
Source: HighWire-hosted journal article supplement (http://qualitysafety.bmj.com/highwire/filestream/161929/field_highwire_adjunct_files/4/bmjqs-2021-013514supp005_data_supplement.pdf)

## Supplementary 5 - Making Data Count Powerpoint (2)

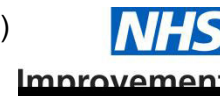

# Making data count

– the why, the how and the experience so far

6<sup>th</sup> July 2018

Samantha Riley, Head of Improvement Analytics, NHS Improvement

Mark Outhwaite, Non Exec Director, Avon & Wiltshire Mental Health Partnership NHS Trust

collaboration

trust

respect

innovation

courage

compassion

# Where are we now?

## Appendix 1 - Single Oversight Framework (Index 1)

| ID                                                                                   | Measure | Unit  | Target | Current | Delta | Trend | Risk | Status | Notes |
|--------------------------------------------------------------------------------------|---------|-------|--------|---------|-------|-------|------|--------|-------|
|                                                                                      |         |       |        |         |       |       |      |        |       |
| RTT Incomplete pathways wait (25%)                                                   | Target  | 25.0% | 25.0%  | 25.0%   | 0.0%  | 0.0%  | 0.0% | 0.0%   |       |
|                                                                                      | Current | 25.0% | 25.0%  | 25.0%   | 0.0%  | 0.0%  | 0.0% | 0.0%   |       |
|                                                                                      | Delta   | 0.0%  | 0.0%   | 0.0%    | 0.0%  | 0.0%  | 0.0% | 0.0%   |       |
|                                                                                      | Status  | 0.0%  | 0.0%   | 0.0%    | 0.0%  | 0.0%  | 0.0% | 0.0%   |       |
| RTT Incomplete pathways wait (Median)                                                | Target  | 25.0% | 25.0%  | 25.0%   | 0.0%  | 0.0%  | 0.0% | 0.0%   |       |
|                                                                                      | Current | 25.0% | 25.0%  | 25.0%   | 0.0%  | 0.0%  | 0.0% | 0.0%   |       |
|                                                                                      | Delta   | 0.0%  | 0.0%   | 0.0%    | 0.0%  | 0.0%  | 0.0% | 0.0%   |       |
|                                                                                      | Status  | 0.0%  | 0.0%   | 0.0%    | 0.0%  | 0.0%  | 0.0% | 0.0%   |       |
| RTT Incomplete pathways wait (25th percentile)                                       | Target  | 25.0% | 25.0%  | 25.0%   | 0.0%  | 0.0%  | 0.0% | 0.0%   |       |
|                                                                                      | Current | 25.0% | 25.0%  | 25.0%   | 0.0%  | 0.0%  | 0.0% | 0.0%   |       |
|                                                                                      | Delta   | 0.0%  | 0.0%   | 0.0%    | 0.0%  | 0.0%  | 0.0% | 0.0%   |       |
|                                                                                      | Status  | 0.0%  | 0.0%   | 0.0%    | 0.0%  | 0.0%  | 0.0% | 0.0%   |       |
| RTT Incomplete pathways <52 week wait                                                | Target  | 52.0% | 52.0%  | 52.0%   | 0.0%  | 0.0%  | 0.0% | 0.0%   |       |
|                                                                                      | Current | 52.0% | 52.0%  | 52.0%   | 0.0%  | 0.0%  | 0.0% | 0.0%   |       |
|                                                                                      | Delta   | 0.0%  | 0.0%   | 0.0%    | 0.0%  | 0.0%  | 0.0% | 0.0%   |       |
|                                                                                      | Status  | 0.0%  | 0.0%   | 0.0%    | 0.0%  | 0.0%  | 0.0% | 0.0%   |       |
| Emergency Care 4hr standard                                                          | Target  | 4.0%  | 4.0%   | 4.0%    | 0.0%  | 0.0%  | 0.0% | 0.0%   |       |
|                                                                                      | Current | 4.0%  | 4.0%   | 4.0%    | 0.0%  | 0.0%  | 0.0% | 0.0%   |       |
|                                                                                      | Delta   | 0.0%  | 0.0%   | 0.0%    | 0.0%  | 0.0%  | 0.0% | 0.0%   |       |
|                                                                                      | Status  | 0.0%  | 0.0%   | 0.0%    | 0.0%  | 0.0%  | 0.0% | 0.0%   |       |
| ABC Time to initial Assessment: Ambulance arrival (25th percentile) - Type 1         | Target  | 25.0% | 25.0%  | 25.0%   | 0.0%  | 0.0%  | 0.0% | 0.0%   |       |
|                                                                                      | Current | 25.0% | 25.0%  | 25.0%   | 0.0%  | 0.0%  | 0.0% | 0.0%   |       |
|                                                                                      | Delta   | 0.0%  | 0.0%   | 0.0%    | 0.0%  | 0.0%  | 0.0% | 0.0%   |       |
|                                                                                      | Status  | 0.0%  | 0.0%   | 0.0%    | 0.0%  | 0.0%  | 0.0% | 0.0%   |       |
| ABC Time to initial Treatment (Median) - Type 1                                      | Target  | 25.0% | 25.0%  | 25.0%   | 0.0%  | 0.0%  | 0.0% | 0.0%   |       |
|                                                                                      | Current | 25.0% | 25.0%  | 25.0%   | 0.0%  | 0.0%  | 0.0% | 0.0%   |       |
|                                                                                      | Delta   | 0.0%  | 0.0%   | 0.0%    | 0.0%  | 0.0%  | 0.0% | 0.0%   |       |
|                                                                                      | Status  | 0.0%  | 0.0%   | 0.0%    | 0.0%  | 0.0%  | 0.0% | 0.0%   |       |
| ABC unplanned return within 7 days - Type 1                                          | Target  | 7.0%  | 7.0%   | 7.0%    | 0.0%  | 0.0%  | 0.0% | 0.0%   |       |
|                                                                                      | Current | 7.0%  | 7.0%   | 7.0%    | 0.0%  | 0.0%  | 0.0% | 0.0%   |       |
|                                                                                      | Delta   | 0.0%  | 0.0%   | 0.0%    | 0.0%  | 0.0%  | 0.0% | 0.0%   |       |
|                                                                                      | Status  | 0.0%  | 0.0%   | 0.0%    | 0.0%  | 0.0%  | 0.0% | 0.0%   |       |
| ABC left without being seen - Type 1                                                 | Target  | 1.0%  | 1.0%   | 1.0%    | 0.0%  | 0.0%  | 0.0% | 0.0%   |       |
|                                                                                      | Current | 1.0%  | 1.0%   | 1.0%    | 0.0%  | 0.0%  | 0.0% | 0.0%   |       |
|                                                                                      | Delta   | 0.0%  | 0.0%   | 0.0%    | 0.0%  | 0.0%  | 0.0% | 0.0%   |       |
|                                                                                      | Status  | 0.0%  | 0.0%   | 0.0%    | 0.0%  | 0.0%  | 0.0% | 0.0%   |       |
| ABC Time to departure (25th percentile) - Type 1**                                   | Target  | 25.0% | 25.0%  | 25.0%   | 0.0%  | 0.0%  | 0.0% | 0.0%   |       |
|                                                                                      | Current | 25.0% | 25.0%  | 25.0%   | 0.0%  | 0.0%  | 0.0% | 0.0%   |       |
|                                                                                      | Delta   | 0.0%  | 0.0%   | 0.0%    | 0.0%  | 0.0%  | 0.0% | 0.0%   |       |
|                                                                                      | Status  | 0.0%  | 0.0%   | 0.0%    | 0.0%  | 0.0%  | 0.0% | 0.0%   |       |
| Number of ambulance handovers between ambulance and A&E waiting more than 30 minutes | Target  | 30.0% | 30.0%  | 30.0%   | 0.0%  | 0.0%  | 0.0% | 0.0%   |       |
|                                                                                      | Current | 30.0% | 30.0%  | 30.0%   | 0.0%  | 0.0%  | 0.0% | 0.0%   |       |
|                                                                                      | Delta   | 0.0%  | 0.0%   | 0.0%    | 0.0%  | 0.0%  | 0.0% | 0.0%   |       |
|                                                                                      | Status  | 0.0%  | 0.0%   | 0.0%    | 0.0%  | 0.0%  | 0.0% | 0.0%   |       |
| Number of ambulance handovers between ambulance and A&E waiting more than 90 minutes | Target  | 90.0% | 90.0%  | 90.0%   | 0.0%  | 0.0%  | 0.0% | 0.0%   |       |
|                                                                                      | Current | 90.0% | 90.0%  | 90.0%   | 0.0%  | 0.0%  | 0.0% | 0.0%   |       |
|                                                                                      | Delta   | 0.0%  | 0.0%   | 0.0%    | 0.0%  | 0.0%  | 0.0% | 0.0%   |       |
|                                                                                      | Status  | 0.0%  | 0.0%   | 0.0%    | 0.0%  | 0.0%  | 0.0% | 0.0%   |       |
| ABC 12-hour Trolley wait - Type 1                                                    | Target  | 12.0% | 12.0%  | 12.0%   | 0.0%  | 0.0%  | 0.0% | 0.0%   |       |
|                                                                                      | Current | 12.0% | 12.0%  | 12.0%   | 0.0%  | 0.0%  | 0.0% | 0.0%   |       |
|                                                                                      | Delta   | 0.0%  | 0.0%   | 0.0%    | 0.0%  | 0.0%  | 0.0% | 0.0%   |       |
|                                                                                      | Status  | 0.0%  | 0.0%   | 0.0%    | 0.0%  | 0.0%  | 0.0% | 0.0%   |       |
| New Cancer 31 days subsequent Treatment (Drug Therapy)                               | Target  | 31.0% | 31.0%  | 31.0%   | 0.0%  | 0.0%  | 0.0% | 0.0%   |       |
|                                                                                      | Current | 31.0% | 31.0%  | 31.0%   | 0.0%  | 0.0%  | 0.0% | 0.0%   |       |
|                                                                                      | Delta   | 0.0%  | 0.0%   | 0.0%    | 0.0%  | 0.0%  | 0.0% | 0.0%   |       |
|                                                                                      | Status  | 0.0%  | 0.0%   | 0.0%    | 0.0%  | 0.0%  | 0.0% | 0.0%   |       |
| New Cancer 31 days subsequent Treatment (Surgery)                                    | Target  | 31.0% | 31.0%  | 31.0%   | 0.0%  | 0.0%  | 0.0% | 0.0%   |       |
|                                                                                      | Current | 31.0% | 31.0%  | 31.0%   | 0.0%  | 0.0%  | 0.0% | 0.0%   |       |
|                                                                                      | Delta   | 0.0%  | 0.0%   | 0.0%    | 0.0%  | 0.0%  | 0.0% | 0.0%   |       |
|                                                                                      | Status  | 0.0%  | 0.0%   | 0.0%    | 0.0%  | 0.0%  | 0.0% | 0.0%   |       |
| New Cancer 62 days (consultant upgrade)                                              | Target  | 62.0% | 62.0%  | 62.0%   | 0.0%  | 0.0%  | 0.0% | 0.0%   |       |
|                                                                                      | Current | 62.0% | 62.0%  | 62.0%   | 0.0%  | 0.0%  | 0.0% | 0.0%   |       |
|                                                                                      | Delta   | 0.0%  | 0.0%   | 0.0%    | 0.0%  | 0.0%  | 0.0% | 0.0%   |       |
|                                                                                      | Status  | 0.0%  | 0.0%   | 0.0%    | 0.0%  | 0.0%  | 0.0% | 0.0%   |       |
| New Cancer 62 days (screening)                                                       | Target  | 62.0% | 62.0%  | 62.0%   | 0.0%  | 0.0%  | 0.0% | 0.0%   |       |
|                                                                                      | Current | 62.0% | 62.0%  | 62.0%   | 0.0%  | 0.0%  | 0.0% | 0.0%   |       |
|                                                                                      | Delta   | 0.0%  | 0.0%   | 0.0%    | 0.0%  | 0.0%  | 0.0% | 0.0%   |       |
|                                                                                      | Status  | 0.0%  | 0.0%   | 0.0%    | 0.0%  | 0.0%  | 0.0% | 0.0%   |       |
| New Cancer GP 62 Day (New Rules)                                                     | Target  | 62.0% | 62.0%  | 62.0%   | 0.0%  | 0.0%  | 0.0% | 0.0%   |       |
|                                                                                      | Current | 62.0% | 62.0%  | 62.0%   | 0.0%  | 0.0%  | 0.0% | 0.0%   |       |
|                                                                                      | Delta   | 0.0%  | 0.0%   | 0.0%    | 0.0%  | 0.0%  | 0.0% | 0.0%   |       |
|                                                                                      | Status  | 0.0%  | 0.0%   | 0.0%    | 0.0%  | 0.0%  | 0.0% | 0.0%   |       |
| New Cancer 62 Day (New Rules)                                                        | Target  | 62.0% | 62.0%  | 62.0%   | 0.0%  | 0.0%  | 0.0% | 0.0%   |       |
|                                                                                      | Current | 62.0% | 62.0%  | 62.0%   | 0.0%  | 0.0%  | 0.0% | 0.0%   |       |
|                                                                                      | Delta   | 0.0%  | 0.0%   | 0.0%    | 0.0%  | 0.0%  | 0.0% | 0.0%   |       |
|                                                                                      | Status  | 0.0%  | 0.0%   | 0.0%    | 0.0%  | 0.0%  | 0.0% | 0.0%   |       |
| New Cancer Two week Rule (New Rules)                                                 | Target  | 2.0%  | 2.0%   | 2.0%    | 0.0%  | 0.0%  | 0.0% | 0.0%   |       |
|                                                                                      | Current | 2.0%  | 2.0%   | 2.0%    | 0.0%  | 0.0%  | 0.0% | 0.0%   |       |
|                                                                                      | Delta   | 0.0%  | 0.0%   | 0.0%    | 0.0%  | 0.0%  | 0.0% | 0.0%   |       |
|                                                                                      | Status  | 0.0%  | 0.0%   | 0.0%    | 0.0%  | 0.0%  | 0.0% | 0.0%   |       |
| Diagnosed Symptomatic Two week Rule (New Rules)                                      | Target  | 2.0%  | 2.0%   | 2.0%    | 0.0%  | 0.0%  | 0.0% | 0.0%   |       |
|                                                                                      | Current | 2.0%  | 2.0%   | 2.0%    | 0.0%  | 0.0%  | 0.0% | 0.0%   |       |
|                                                                                      | Delta   | 0.0%  | 0.0%   | 0.0%    | 0.0%  | 0.0%  | 0.0% | 0.0%   |       |
|                                                                                      | Status  | 0.0%  | 0.0%   | 0.0%    | 0.0%  | 0.0%  | 0.0% | 0.0%   |       |

\*Data collection validation and monitoring process from data collection on 14/07/2017 with amendments to May 2018  
 \*\*Standard metric

## Appendix 1

## Safety &amp; Quality Dashboard

Mar 2018

| ID         | Measure                                | Indicator           | Previous Period | Previous Value | Latest Period | Latest Value | Difference | Trendline | Target | 2023/24 Target | 2023/24 Average |
|------------|----------------------------------------|---------------------|-----------------|----------------|---------------|--------------|------------|-----------|--------|----------------|-----------------|
| SAFE       | Patient Safety: Death Rate (Unplanned) | Unplanned Mortality | January 2018    | 1.1%           | February 2018 | 1.0%         | -0.1%      | ▲         | 1.0%   | 0.9%           | 0.9%            |
|            | Patient Safety: Death Rate (Planned)   | Planned Mortality   | January 2018    | 1.1%           | February 2018 | 1.0%         | -0.1%      | ▲         | 1.0%   | 0.9%           | 0.9%            |
|            | Patient Safety: Death Rate (Total)     | Total Mortality     | January 2018    | 1.1%           | February 2018 | 1.0%         | -0.1%      | ▲         | 1.0%   | 0.9%           | 0.9%            |
|            | Patient Safety: Death Rate (Unplanned) | Unplanned Mortality | January 2018    | 1.1%           | February 2018 | 1.0%         | -0.1%      | ▲         | 1.0%   | 0.9%           | 0.9%            |
|            | Patient Safety: Death Rate (Planned)   | Planned Mortality   | January 2018    | 1.1%           | February 2018 | 1.0%         | -0.1%      | ▲         | 1.0%   | 0.9%           | 0.9%            |
|            | Patient Safety: Death Rate (Total)     | Total Mortality     | January 2018    | 1.1%           | February 2018 | 1.0%         | -0.1%      | ▲         | 1.0%   | 0.9%           | 0.9%            |
|            | Patient Safety: Death Rate (Unplanned) | Unplanned Mortality | January 2018    | 1.1%           | February 2018 | 1.0%         | -0.1%      | ▲         | 1.0%   | 0.9%           | 0.9%            |
|            | Patient Safety: Death Rate (Planned)   | Planned Mortality   | January 2018    | 1.1%           | February 2018 | 1.0%         | -0.1%      | ▲         | 1.0%   | 0.9%           | 0.9%            |
|            | Patient Safety: Death Rate (Total)     | Total Mortality     | January 2018    | 1.1%           | February 2018 | 1.0%         | -0.1%      | ▲         | 1.0%   | 0.9%           | 0.9%            |
|            | Patient Safety: Death Rate (Unplanned) | Unplanned Mortality | January 2018    | 1.1%           | February 2018 | 1.0%         | -0.1%      | ▲         | 1.0%   | 0.9%           | 0.9%            |
| CARING     | Patient Safety: Death Rate (Unplanned) | Unplanned Mortality | January 2018    | 1.1%           | February 2018 | 1.0%         | -0.1%      | ▲         | 1.0%   | 0.9%           | 0.9%            |
|            | Patient Safety: Death Rate (Planned)   | Planned Mortality   | January 2018    | 1.1%           | February 2018 | 1.0%         | -0.1%      | ▲         | 1.0%   | 0.9%           | 0.9%            |
|            | Patient Safety: Death Rate (Total)     | Total Mortality     | January 2018    | 1.1%           | February 2018 | 1.0%         | -0.1%      | ▲         | 1.0%   | 0.9%           | 0.9%            |
|            | Patient Safety: Death Rate (Unplanned) | Unplanned Mortality | January 2018    | 1.1%           | February 2018 | 1.0%         | -0.1%      | ▲         | 1.0%   | 0.9%           | 0.9%            |
|            | Patient Safety: Death Rate (Planned)   | Planned Mortality   | January 2018    | 1.1%           | February 2018 | 1.0%         | -0.1%      | ▲         | 1.0%   | 0.9%           | 0.9%            |
|            | Patient Safety: Death Rate (Total)     | Total Mortality     | January 2018    | 1.1%           | February 2018 | 1.0%         | -0.1%      | ▲         | 1.0%   | 0.9%           | 0.9%            |
|            | Patient Safety: Death Rate (Unplanned) | Unplanned Mortality | January 2018    | 1.1%           | February 2018 | 1.0%         | -0.1%      | ▲         | 1.0%   | 0.9%           | 0.9%            |
|            | Patient Safety: Death Rate (Planned)   | Planned Mortality   | January 2018    | 1.1%           | February 2018 | 1.0%         | -0.1%      | ▲         | 1.0%   | 0.9%           | 0.9%            |
|            | Patient Safety: Death Rate (Total)     | Total Mortality     | January 2018    | 1.1%           | February 2018 | 1.0%         | -0.1%      | ▲         | 1.0%   | 0.9%           | 0.9%            |
|            | Patient Safety: Death Rate (Unplanned) | Unplanned Mortality | January 2018    | 1.1%           | February 2018 | 1.0%         | -0.1%      | ▲         | 1.0%   | 0.9%           | 0.9%            |
| EFFECTIVE  | Patient Safety: Death Rate (Unplanned) | Unplanned Mortality | January 2018    | 1.1%           | February 2018 | 1.0%         | -0.1%      | ▲         | 1.0%   | 0.9%           | 0.9%            |
|            | Patient Safety: Death Rate (Planned)   | Planned Mortality   | January 2018    | 1.1%           | February 2018 | 1.0%         | -0.1%      | ▲         | 1.0%   | 0.9%           | 0.9%            |
|            | Patient Safety: Death Rate (Total)     | Total Mortality     | January 2018    | 1.1%           | February 2018 | 1.0%         | -0.1%      | ▲         | 1.0%   | 0.9%           | 0.9%            |
|            | Patient Safety: Death Rate (Unplanned) | Unplanned Mortality | January 2018    | 1.1%           | February 2018 | 1.0%         | -0.1%      | ▲         | 1.0%   | 0.9%           | 0.9%            |
|            | Patient Safety: Death Rate (Planned)   | Planned Mortality   | January 2018    | 1.1%           | February 2018 | 1.0%         | -0.1%      | ▲         | 1.0%   | 0.9%           | 0.9%            |
|            | Patient Safety: Death Rate (Total)     | Total Mortality     | January 2018    | 1.1%           | February 2018 | 1.0%         | -0.1%      | ▲         | 1.0%   | 0.9%           | 0.9%            |
|            | Patient Safety: Death Rate (Unplanned) | Unplanned Mortality | January 2018    | 1.1%           | February 2018 | 1.0%         | -0.1%      | ▲         | 1.0%   | 0.9%           | 0.9%            |
|            | Patient Safety: Death Rate (Planned)   | Planned Mortality   | January 2018    | 1.1%           | February 2018 | 1.0%         | -0.1%      | ▲         | 1.0%   | 0.9%           | 0.9%            |
|            | Patient Safety: Death Rate (Total)     | Total Mortality     | January 2018    | 1.1%           | February 2018 | 1.0%         | -0.1%      | ▲         | 1.0%   | 0.9%           | 0.9%            |
|            | Patient Safety: Death Rate (Unplanned) | Unplanned Mortality | January 2018    | 1.1%           | February 2018 | 1.0%         | -0.1%      | ▲         | 1.0%   | 0.9%           | 0.9%            |
| RESPONSIVE | Patient Safety: Death Rate (Unplanned) | Unplanned Mortality | January 2018    | 1.1%           | February 2018 | 1.0%         | -0.1%      | ▲         | 1.0%   | 0.9%           | 0.9%            |
|            | Patient Safety: Death Rate (Planned)   | Planned Mortality   | January 2018    | 1.1%           | February 2018 | 1.0%         | -0.1%      | ▲         | 1.0%   | 0.9%           | 0.9%            |
|            | Patient Safety: Death Rate (Total)     | Total Mortality     | January 2018    | 1.1%           | February 2018 | 1.0%         | -0.1%      | ▲         | 1.0%   | 0.9%           | 0.9%            |
|            | Patient Safety: Death Rate (Unplanned) | Unplanned Mortality | January 2018    | 1.1%           | February 2018 | 1.0%         | -0.1%      | ▲         | 1.0%   | 0.9%           | 0.9%            |
|            | Patient Safety: Death Rate (Planned)   | Planned Mortality   | January 2018    | 1.1%           | February 2018 | 1.0%         | -0.1%      | ▲         | 1.0%   | 0.9%           | 0.9%            |
|            | Patient Safety: Death Rate (Total)     | Total Mortality     | January 2018    | 1.1%           | February 2018 | 1.0%         | -0.1%      | ▲         | 1.0%   | 0.9%           | 0.9%            |
|            | Patient Safety: Death Rate (Unplanned) | Unplanned Mortality | January 2018    | 1.1%           | February 2018 | 1.0%         | -0.1%      | ▲         | 1.0%   | 0.9%           | 0.9%            |
|            | Patient Safety: Death Rate (Planned)   | Planned Mortality   | January 2018    | 1.1%           | February 2018 | 1.0%         | -0.1%      | ▲         | 1.0%   | 0.9%           | 0.9%            |
|            | Patient Safety: Death Rate (Total)     | Total Mortality     | January 2018    | 1.1%           | February 2018 | 1.0%         | -0.1%      | ▲         | 1.0%   | 0.9%           | 0.9%            |
|            | Patient Safety: Death Rate (Unplanned) | Unplanned Mortality | January 2018    | 1.1%           | February 2018 | 1.0%         | -0.1%      | ▲         | 1.0%   | 0.9%           | 0.9%            |
| WELL-LED   | Patient Safety: Death Rate (Unplanned) | Unplanned Mortality | January 2018    | 1.1%           | February 2018 | 1.0%         | -0.1%      | ▲         | 1.0%   | 0.9%           | 0.9%            |
|            | Patient Safety: Death Rate (Planned)   | Planned Mortality   | January 2018    | 1.1%           | February 2018 | 1.0%         | -0.1%      | ▲         | 1.0%   | 0.9%           | 0.9%            |
|            | Patient Safety: Death Rate (Total)     | Total Mortality     | January 2018    | 1.1%           | February 2018 | 1.0%         | -0.1%      | ▲         | 1.0%   | 0.9%           | 0.9%            |
|            | Patient Safety: Death Rate (Unplanned) | Unplanned Mortality | January 2018    | 1.1%           | February 2018 | 1.0%         | -0.1%      | ▲         | 1.0%   | 0.9%           | 0.9%            |
|            | Patient Safety: Death Rate (Planned)   | Planned Mortality   | January 2018    | 1.1%           | February 2018 | 1.0%         | -0.1%      | ▲         | 1.0%   | 0.9%           | 0.9%            |
|            | Patient Safety: Death Rate (Total)     | Total Mortality     | January 2018    | 1.1%           | February 2018 | 1.0%         | -0.1%      | ▲         | 1.0%   | 0.9%           | 0.9%            |
|            | Patient Safety: Death Rate (Unplanned) | Unplanned Mortality | January 2018    | 1.1%           | February 2018 | 1.0%         | -0.1%      | ▲         | 1.0%   | 0.9%           | 0.9%            |
|            | Patient Safety: Death Rate (Planned)   | Planned Mortality   | January 2018    | 1.1%           | February 2018 | 1.0%         | -0.1%      | ▲         | 1.0%   | 0.9%           | 0.9%            |
|            | Patient Safety: Death Rate (Total)     | Total Mortality     | January 2018    | 1.1%           | February 2018 | 1.0%         | -0.1%      | ▲         | 1.0%   | 0.9%           | 0.9%            |
|            | Patient Safety: Death Rate (Unplanned) | Unplanned Mortality | January 2018    | 1.1%           | February 2018 | 1.0%         | -0.1%      | ▲         | 1.0%   | 0.9%           | 0.9%            |

# Where are we now?

| Safety & Quality Dashboard |                                                            | Mar 2018        |                |               |              |            |                            |                          |                 |
|----------------------------|------------------------------------------------------------|-----------------|----------------|---------------|--------------|------------|----------------------------|--------------------------|-----------------|
| CQC Domain                 | Indicator                                                  | Previous Period | Previous Value | Latest Period | Latest Value | Difference | Trend over previous period | Trend - APR 2017 onwards | 2017/18 Total   |
|                            | Emergency Care - Friends and Family Test - Would Recommend | January 2018    | 93.27%         | February 2018 | 95.73%       | 2.46%      | ▲                          | ▲                        | 2017/18 Average |
|                            |                                                            |                 |                |               |              |            |                            |                          | 94.32%          |

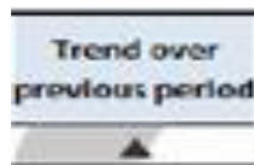

One month trend.....

## Caring

### 7 Family and Friends Test (FFT) (data up to February 2018)

- 7.2 The Trusts 'Would Recommend' for Friends and Family returns increased to 95.76% for February 2018 from 95.36% in January 2018. The percentage of patients who stated they 'Wouldn't Recommend' decreased to 0.85% in February 2018 from 1.07% in January 2018.

Is an increase from 95.36% to 95.76% important or distracting narrative?

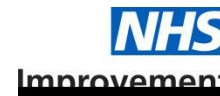

# Poll 1

What best describes your current integrated performance for the board :

- Mainly RAG charts
- A mixture of RAG and time series data/spark lines
- Presence of SPC charts

collaboration

trust

respect

innovation

courage

compassion



## Improving Access to Psychological Therapies – performance against target

| Metric                      | Target | Jan-17 | Feb-17 | Mar-17 | Apr-17 | May-17 | Jun-17 | Jul-17 | Aug-17 |
|-----------------------------|--------|--------|--------|--------|--------|--------|--------|--------|--------|
| IAPT Treatment 18 weeks     | 95%    | 99.8%  | 99.5%  | 99.9%  | 99.8%  | 99.4%  | 99.7%  | 99.6%  | 99.7%  |
| IAPT Treatment 6 weeks      | 75%    | 86.3%  | 84.1%  | 83.3%  | 80.9%  | 74.9%  | 79.5%  | 81.1%  | 81.2%  |
| IAPT Recovery Rate          | 50%    | 59.3%  | 57.0%  | 54.0%  | 55.3%  | 53.6%  | 52.2%  | 55.3%  | 54.8%  |
| EIS First Episode Psychosis | 50%    | 100.0% | 100.0% | 83.0%  | 62.5%  | 100.0% | 89.5%  | 100.0% | 85.0%  |

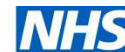
**Improvement**

IAPT Recovery Rate

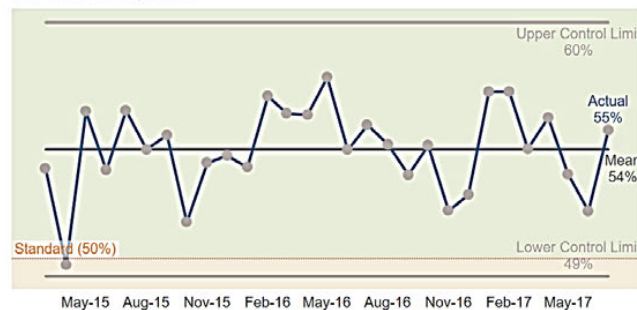

EIS - First Episode Of Psychosis

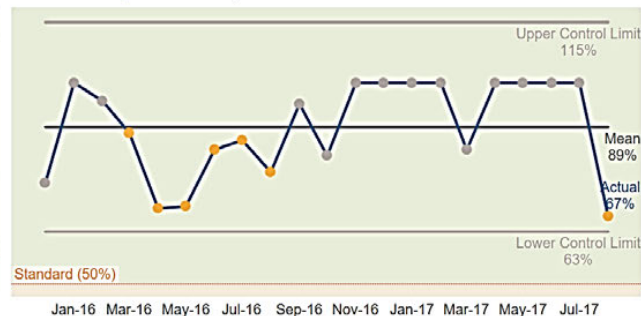

IAPT Treatment 6 Weeks

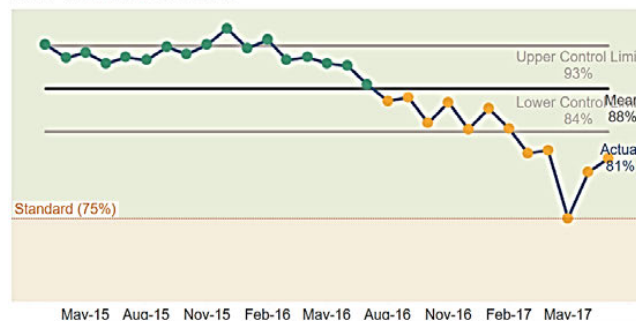

IAPT Treatment 18 Weeks

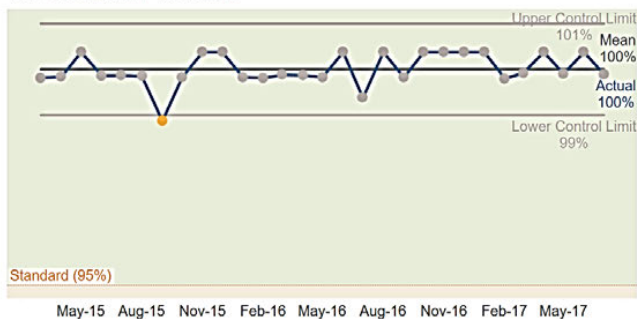

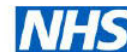

Improvement

# Did green provide true assurance?

IAPT Treatment 6 Weeks

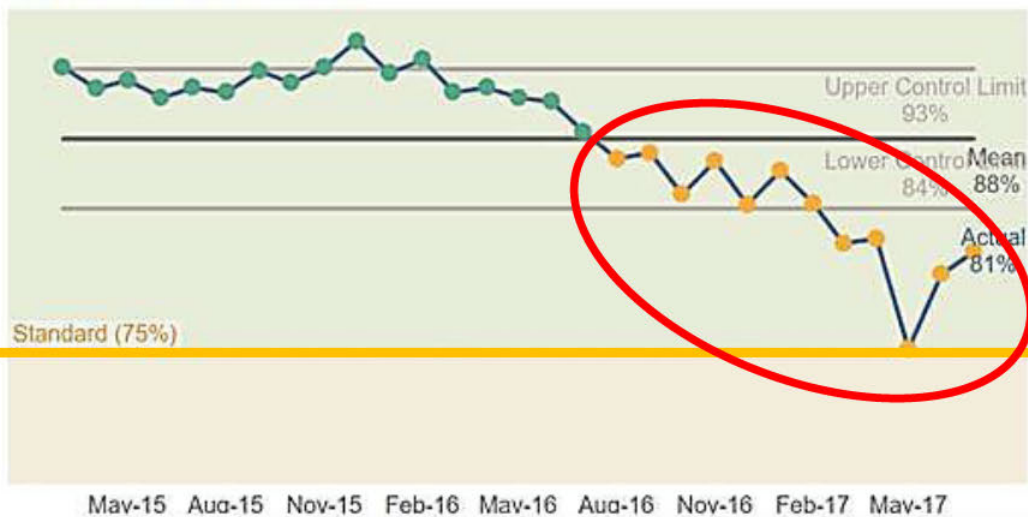

# Scenario

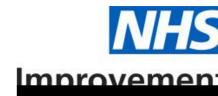

We're going to simulate some **real data** in a healthcare setting

We'll be thinking about **how people react to patterns and trends** in data.

Can you spot an **improvement or decline** when it occurs? We'll begin plotting our data in a **run chart**.

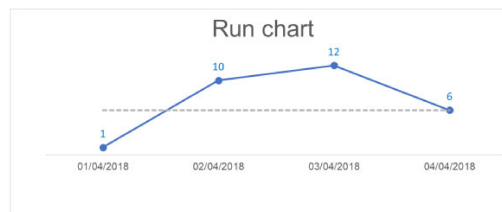



Improvement

# Reducing serious incidents

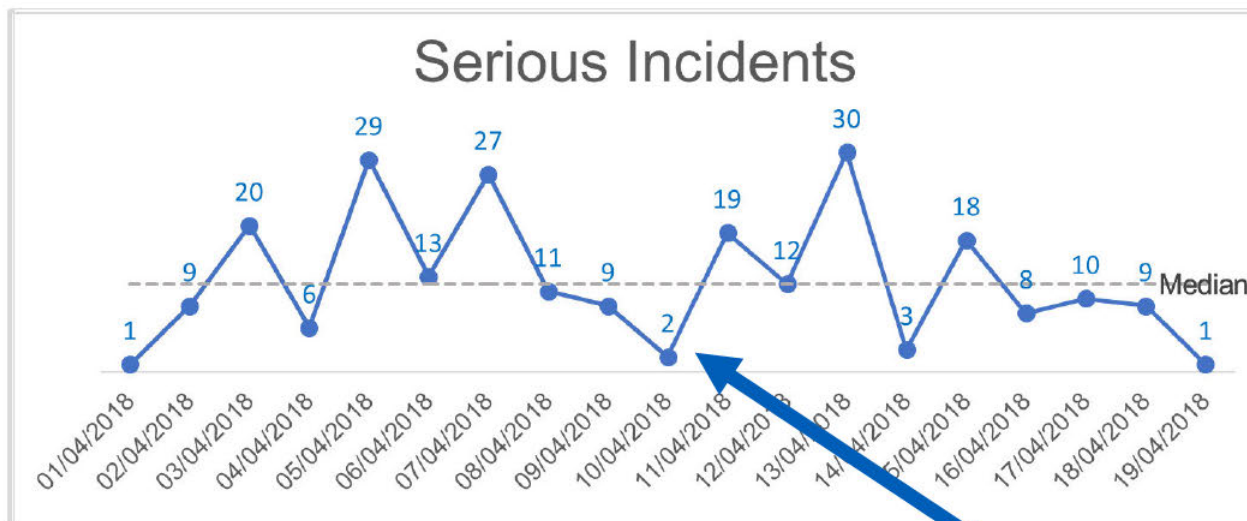

Has the improvement idea been successful?

Are you worried you might have seen this pattern before?



Improvement

# Improvement idea

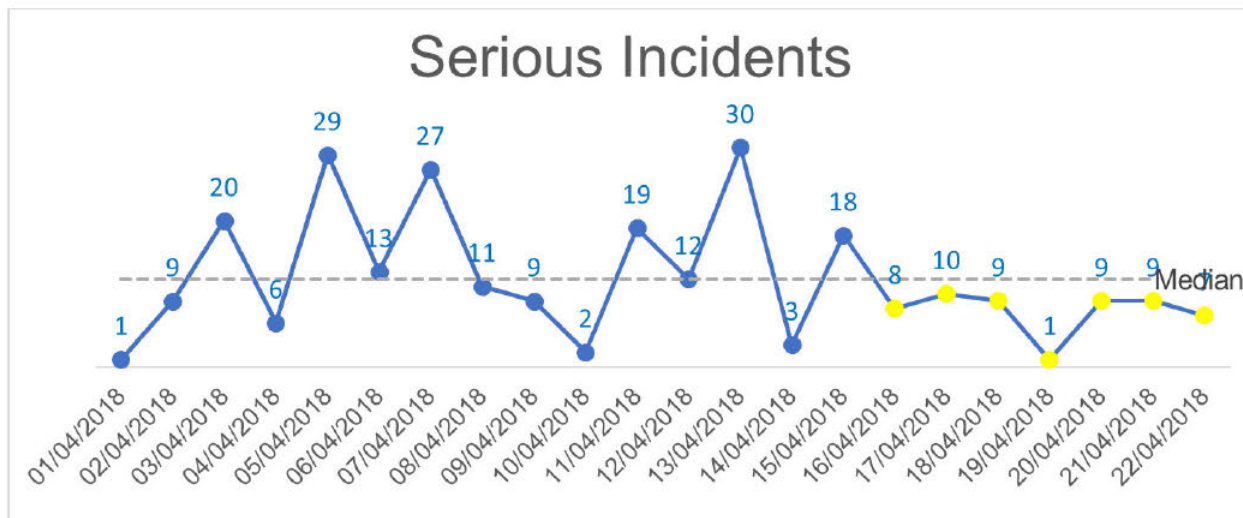

Now seven days below the baseline median...

We could go on... when should we recognise a trend?



Improvement

# The data that created this scenario

## Prime ministers birthday's - random variation

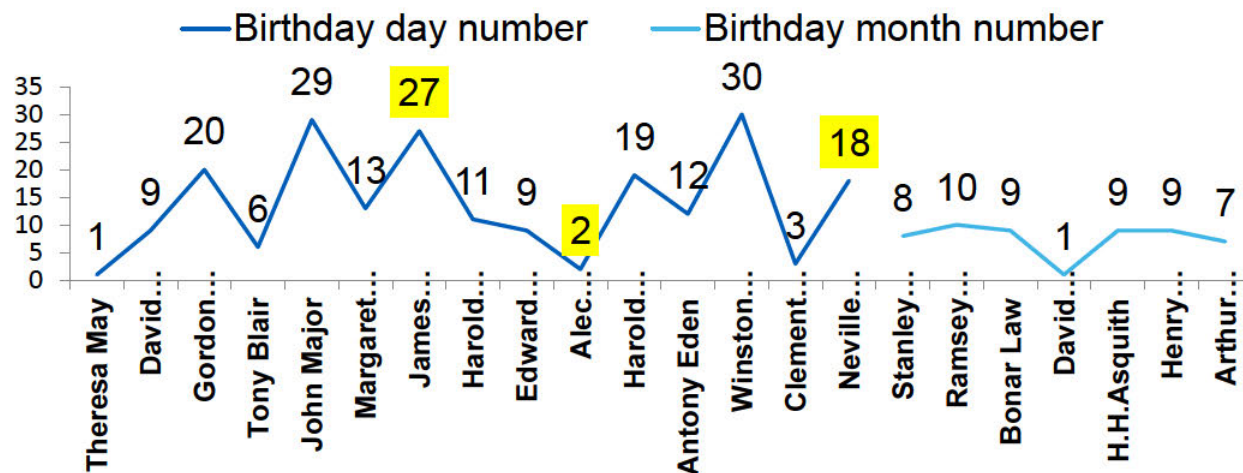

Any patterns at these points were randomly generated, then I changed the rules of the scenario....



Improvement

# Anatomy of a SPC chart

Time series line chart with 3 reference lines

20 plus data points for a robust analysis

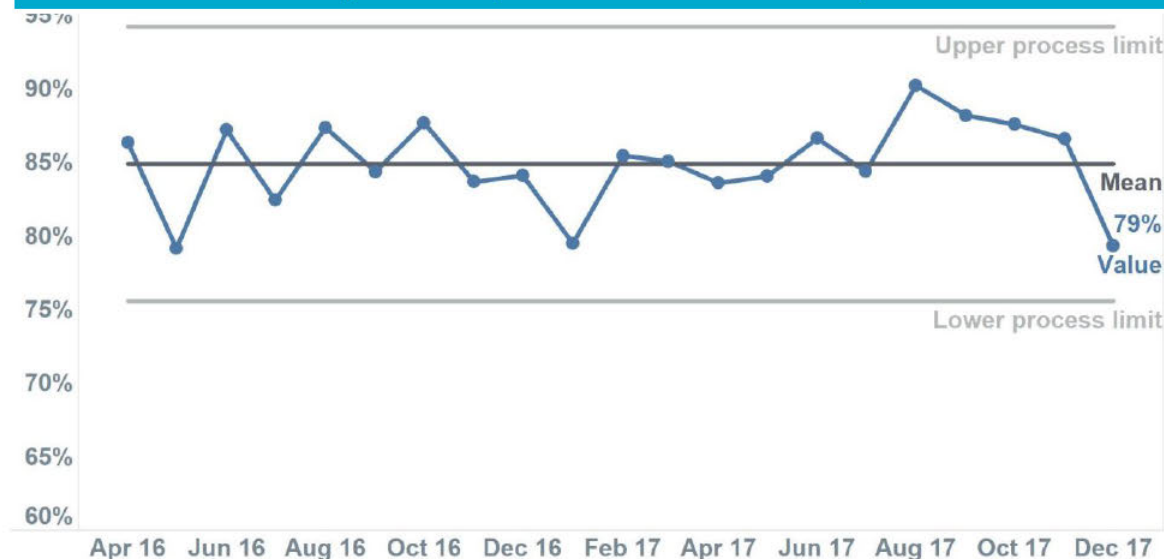

≈ 99% of  
data

# SPC rules

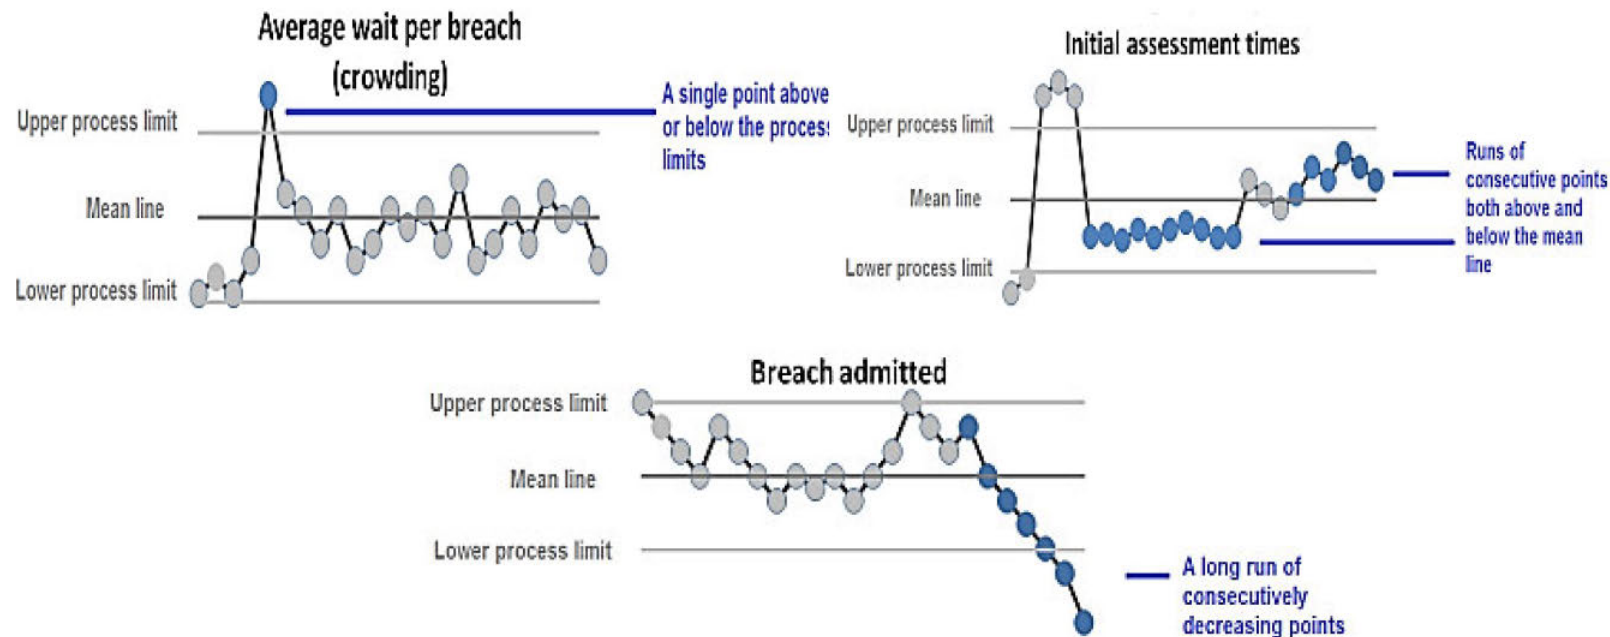

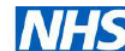

Improvement

# Why is 7 significant?

**A trend of 2** has the probability of 25% occurrence (**one in four**)

**A trend of 4** has the probability of 6.25% occurrence (**one in sixteen**)

**A trend of 7** has the probability of 0.8% occurrence (**one in one hundred and twenty-eight**)

20

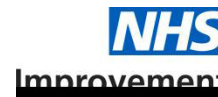

## CQC – signs of a mature QI approach

3. The Board looks at data as time series analysis, and makes decisions based on an understanding of variation.<sup>1</sup>

<sup>1</sup> data are presented as run or control charts, instead of bar graphs, pie charts or RAG rated. Narrative analysis describes system quality and performance using terminology of common cause and special cause variation.

[https://www.cqc.org.uk/sites/default/files/20180404\\_9001395\\_briefguide-quality\\_improvement\\_healthcare\\_provider%20v1.pdf](https://www.cqc.org.uk/sites/default/files/20180404_9001395_briefguide-quality_improvement_healthcare_provider%20v1.pdf)

# If there is 'special cause'

A single point outside the control limits

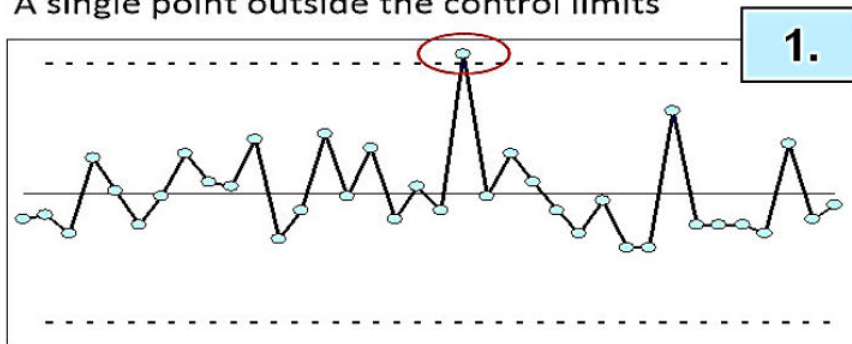

# Unacceptable variation

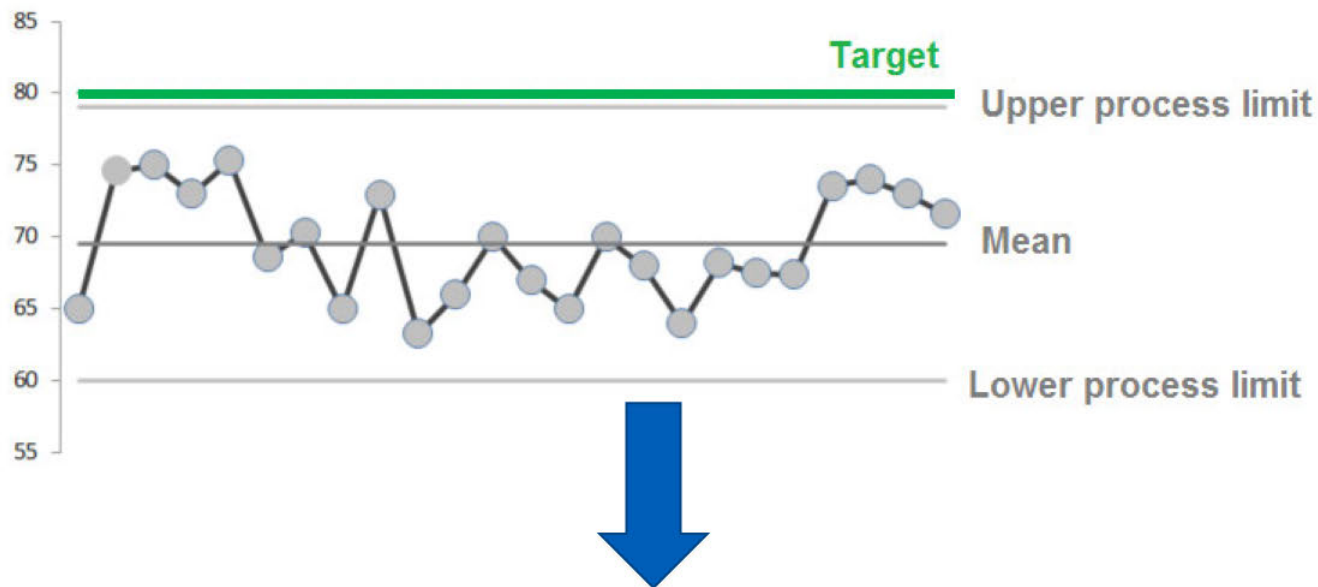

**Redesign the system**

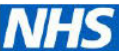

Improvement

# Everything is failing?

|          |                                              |        |        |        |           |        |        |        |           | Combined Trust Performance |        |        |              |           | Trust data 13 months |
|----------|----------------------------------------------|--------|--------|--------|-----------|--------|--------|--------|-----------|----------------------------|--------|--------|--------------|-----------|----------------------|
| Domain   | Indicator                                    | Jul-17 | Aug-17 | Sep-17 | 2017-2018 | Jul-17 | Aug-17 | Sep-17 | 2017-2018 | Jul-17                     | Aug-17 | Sep-17 | 2017-2018 Q2 | 2017-2018 | Trend charts         |
| Training | Mandatory training compliance (Target: >90%) | 85.4%  | 86.1%  | 85.5%  | 84.8%     | 85.2%  | 86.5%  | 85.7%  | 85.1%     | 85.4%                      | 86.2%  | 85.6%  | 85.7%        | 84.8%     |                      |

# Presentation influences discussion

Target

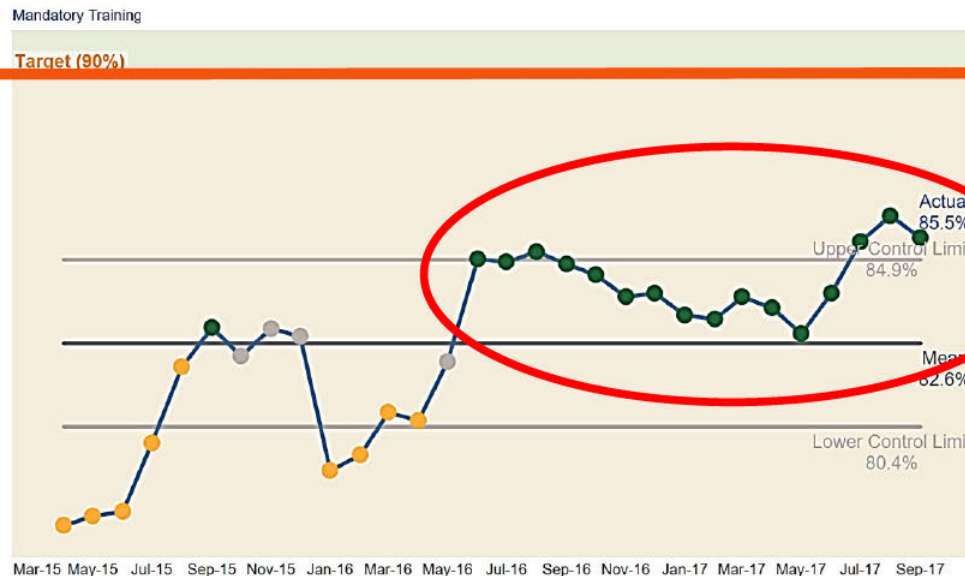

# Are things improving?

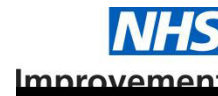

## Patient Experience Dashboard

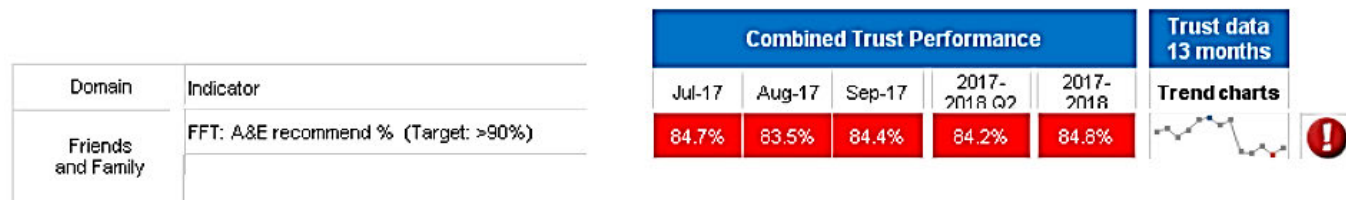

### Friends and Family Test - A&E recommend %

The recommend rate **improved** from the previous month however remains below the 90%.

# SPC changes the narrative

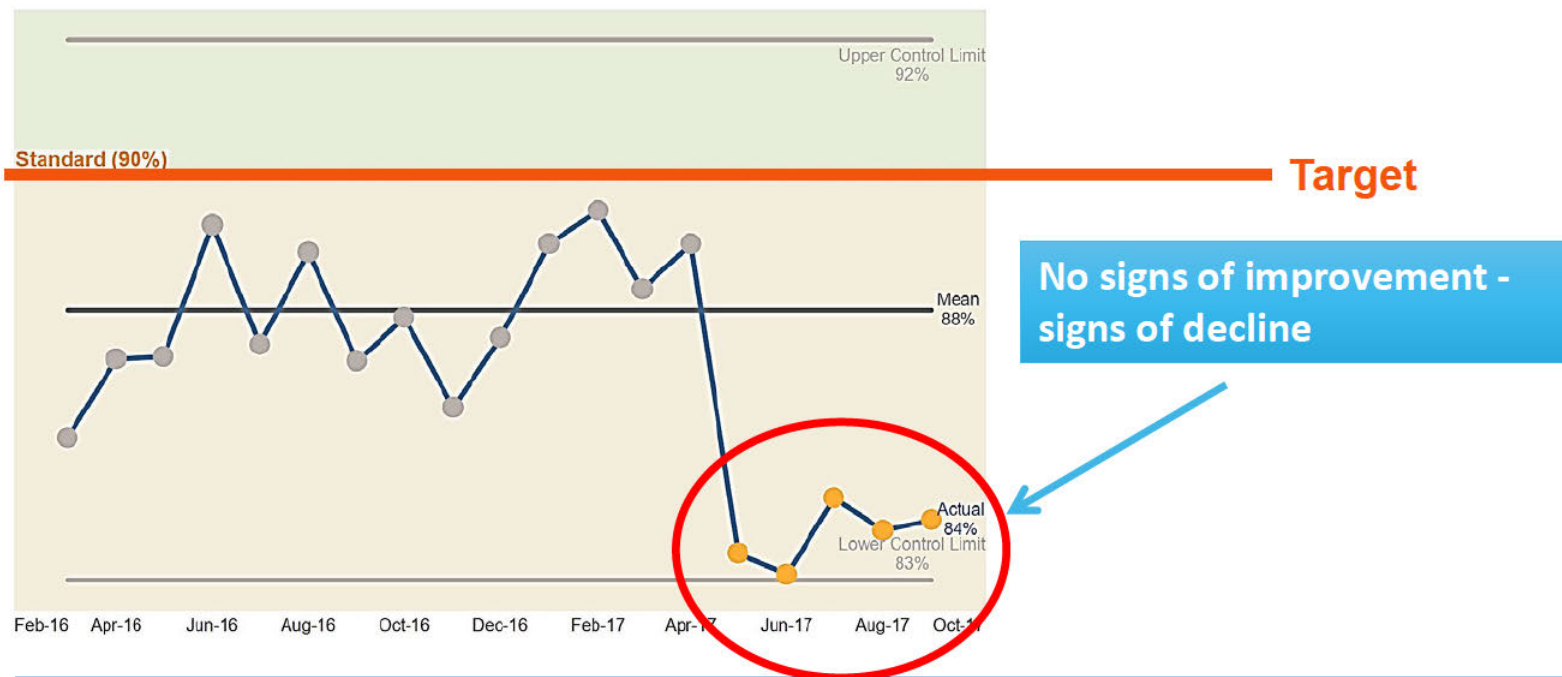

# Serious incidents

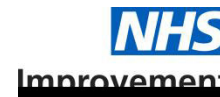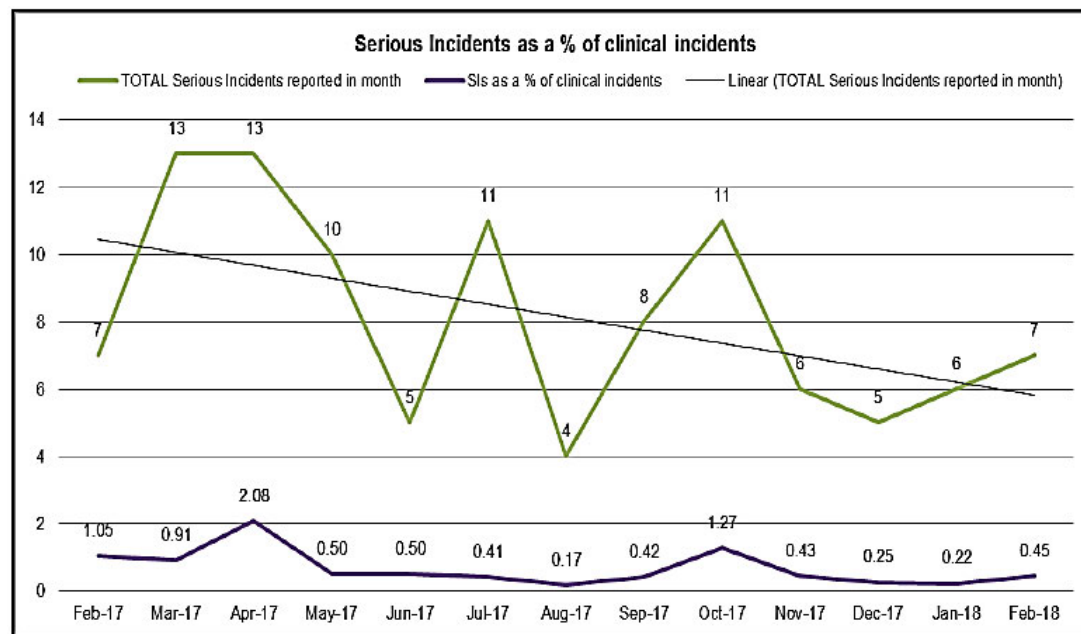

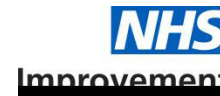

## Poll 2

The number of serious incidents occurring is :

- Improving
- Declining
- Staying the same

collaboration

trust

respect

innovation

courage

compassion

# Level of variation acceptable?

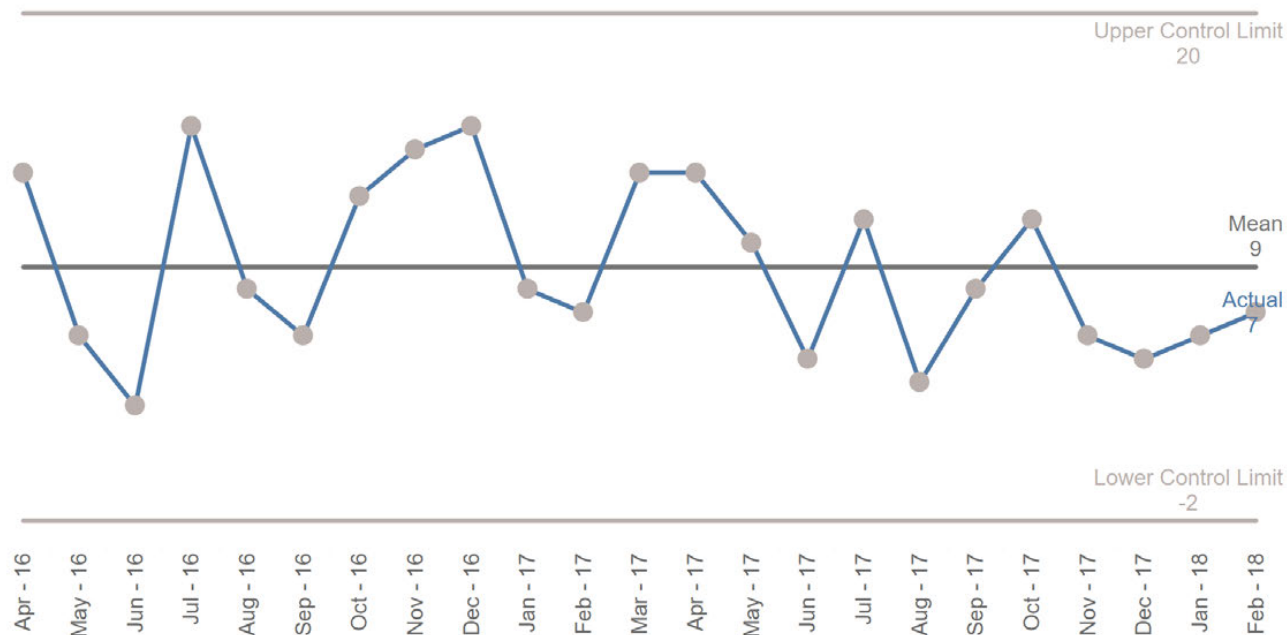

# Will the target always be achieved? Improvement

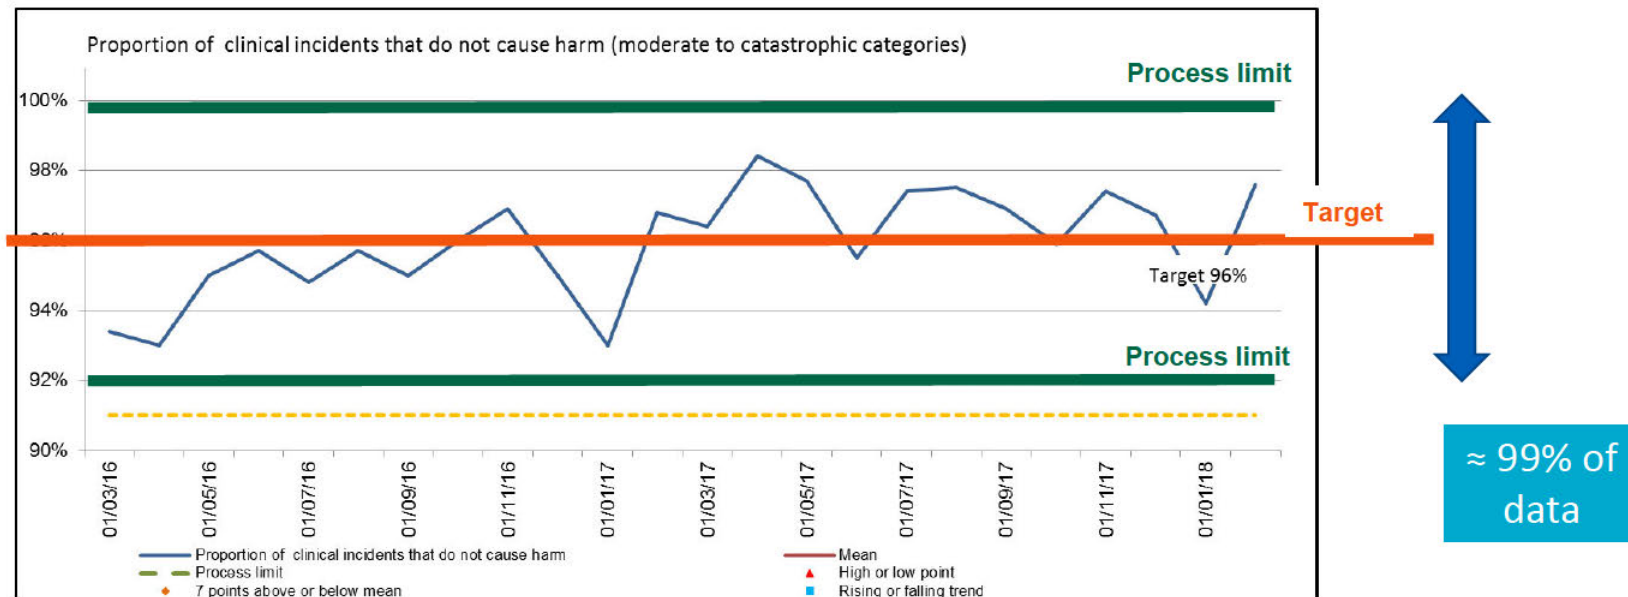

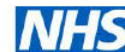

Improvement

# Thinking outside the box

University Hospital NH

A &amp; E 4 hour performance

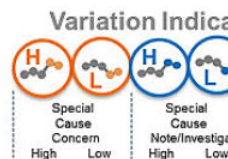

|                               |                                                                                          |        | Target | Mean   | Variance | Comment                                                                                                                                                                                  |
|-------------------------------|------------------------------------------------------------------------------------------|--------|--------|--------|----------|------------------------------------------------------------------------------------------------------------------------------------------------------------------------------------------|
| Arrivals                      | A & E 4 hour performance                                                                 | Dec 17 | 73     | 96     | 83       | Higher                                                                                                                                                                                   |
|                               | Arrivals non ambulance                                                                   | Nov 17 | 11,581 | 10,902 | Smaller  | This indicator is not expected to be the target and/or sudden change. This indicator is in special cause variation (on the low side of the scale) - investigate to understand the cause. |
|                               | Arrivals ambulance                                                                       | Nov 17 | 3,191  | 3,090  | Smaller  |                                                                                                                                                                                          |
|                               | Ambulance handovers over 30mins                                                          | Nov 17 | 67     | 75     | Smaller  | This indicator is in special cause variation (on the low side of the scale) - investigate to understand the cause.                                                                       |
| Assessment and Treatment      | Average Duration (mins) to initial assessment - non Ambulance                            | Nov 17 | 23     | 25     | Smaller  | This indicator is in special cause variation (on the low side of the scale) - investigate to understand the cause.                                                                       |
|                               | Brought in by ambulance (including helicopter/air ambulance) Average Duration (mins)     | Nov 17 | 16     | 15     | Smaller  |                                                                                                                                                                                          |
|                               | Average Duration (mins) to treatment - non Ambulance                                     | Nov 17 | 106    | 98     | Smaller  | This indicator is in special cause variation (on the low side of the scale) - investigate to understand the cause.                                                                       |
|                               | Brought in by ambulance (including helicopter/air ambulance) Avg. Duration To Treat...   | Nov 17 | 115    | 126    | Smaller  | This indicator is in special cause variation (on the high side of the scale) - investigate to understand the cause.                                                                      |
|                               | Time from treat to departure                                                             | Nov 17 | 196    | 197    | Smaller  |                                                                                                                                                                                          |
|                               | Average wait per breach - crowding                                                       | Nov 17 | 367    | 404    | Smaller  | This indicator is in special cause variation (on the low side of the scale) - investigate to understand the cause.                                                                       |
|                               | % of re-attenders within 7 days                                                          | Nov 17 | 11     | 10     | Smaller  | This indicator is in special cause variation (on the high side of the scale) - investigate to understand the cause.                                                                      |
|                               | Breaches                                                                                 | Oct 17 | 1,547  | 1,627  | Smaller  |                                                                                                                                                                                          |
|                               | Breach admitted                                                                          | Oct 17 | 51     | 42     | Smaller  |                                                                                                                                                                                          |
|                               | Breach not admitted                                                                      | Oct 17 | 49     | 58     | Smaller  |                                                                                                                                                                                          |
| Admissions and Inpatient stay | GP admissions                                                                            | Oct 17 | 32     | 59     | Smaller  | This indicator is in special cause variation (on the low side of the scale) - investigate to understand the cause.                                                                       |
|                               | AE admissions                                                                            | Oct 17 | 1,814  | 1,676  | Smaller  | This indicator is in special cause variation (on the high side of the scale) - investigate to understand the cause.                                                                      |
|                               | Conversion rate                                                                          | Nov 17 | 21     | 17     | Smaller  | This indicator is in special cause variation (on the high side of the scale) - investigate to understand the cause.                                                                      |
|                               | Admissions for avoidable conditions                                                      | Oct 17 | 1,546  | 312    | Smaller  |                                                                                                                                                                                          |
|                               | Delayed transfers of Care (patients overall)                                             | Oct 17 | 182    | 53     | Smaller  |                                                                                                                                                                                          |
|                               | Stranded Patients (number of patients 18 years and over who have been in hospital ov...  | Nov 17 | 51     | 10     | Smaller  |                                                                                                                                                                                          |
|                               | LOS 80th centile excluding zero LOS                                                      | Nov 17 | 9      | 15,809 | Smaller  | This indicator is in special cause variation (on the low side of the scale) - investigate to understand the cause.                                                                       |
|                               | Patients in bed at midnight                                                              | Oct 17 | 16,601 | 89     | Smaller  |                                                                                                                                                                                          |
|                               | Patients discharged to their Usual Place of Residency                                    | Oct 17 | 87     | 19     | Smaller  | This indicator is in special cause variation (on the low side of the scale) - investigate to understand the cause.                                                                       |
|                               | % discharged over weekend                                                                | Nov 17 | 16     | 21     | Smaller  |                                                                                                                                                                                          |
| Other                         | Emergency re-admissions within 30 days following an elective or emergency spell at th... | Nov 17 | 16     | 228    | Smaller  | This indicator is in special cause variation (on the low side of the scale) - investigate to understand the cause.                                                                       |
|                               | Staff sickness                                                                           | Nov 17 | 214    | 58     | Smaller  |                                                                                                                                                                                          |
|                               | A&E Scores from Friends and Family Test - % positive                                     | Oct 17 | 58     | 94     | Higher   |                                                                                                                                                                                          |
|                               | Inpatient Scores from Friends and Family Test - % positive                               | Oct 17 | 94     |        | Higher   |                                                                                                                                                                                          |

# SPC Appendix

## A&E 4 hour performance (%)

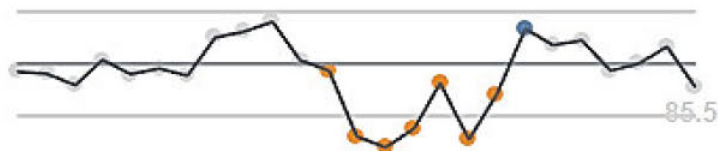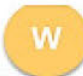

## Emergency flow improvement tool

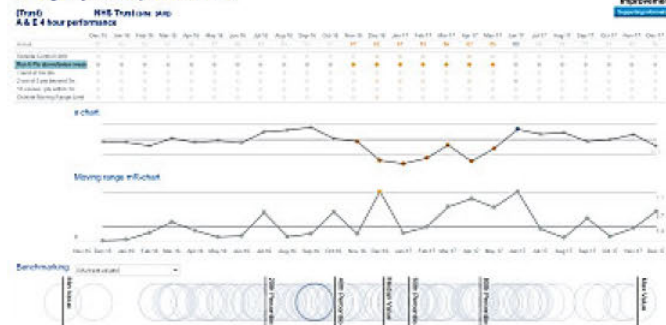

## Supporting contextual commentary

# What is changing?

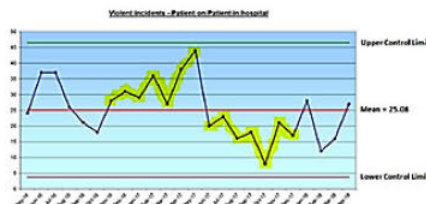

There were 74 patient on staff violent incidents reported trust wide. SPC analysis shows that this is a special cause variation as it is outside of the predicted range for the number of monthly incidents.

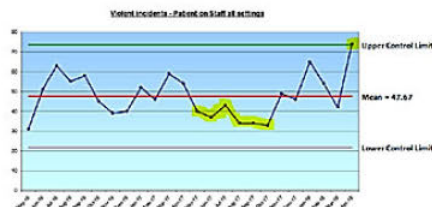

Further analysis shows that both the number of incidents on Haven Ward and Haven incidents as a proportion of total incidents is increasing. When Haven Ward is excluded from the total figures for the Trust the number of incidents is stable and predictable; it will range between 14.87 and 61.13 with a mean of 38.

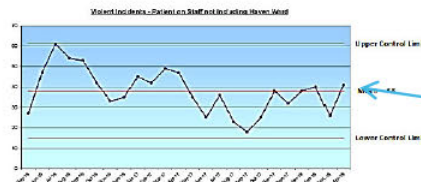

During April one violent patient on staff incident was a moderate incident on Haven Ward and will be subject to a Serious Incident Investigation. A staff member has since returned to work, following a Section 136 from Police custody. The staff member has since returned to work, well supported by wider team management. The rest were low or no harm incidents. Haven and St Brelades were the top two reporters with Haven reporting 33 incidents and St Brelades 20. SPC analysis for St Brelades shows that April's figure is within predicted range of variation (0 to 21.95). On St Brelades Ward one patient was involved in seven incidents; the same patient was involved in three of the patient on patient incidents as well.

SPC analysis for patient on staff violent incidents on Haven shows that this is special cause variation (part run of 6 above mean).

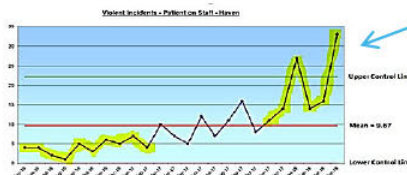

During April two patients on Haven were involved in 20 incidents. The majority of incidents were caused by three patients who were acutely unwell. The rest of the violence towards staff was one-off incidents by individual patients. Following the weekly incident reviews in place on Haven, the team identified the individuals concerned, conducted RCAs and organised risk huddles with all team members to create behaviour support plans in order to

SPC charts

Highlighting special cause

Supporting narrative

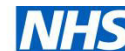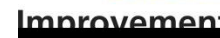

# Dorset Healthcare's SPC Journey

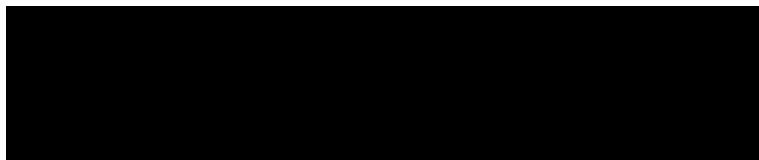

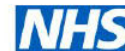

Improvement

# Advice to others

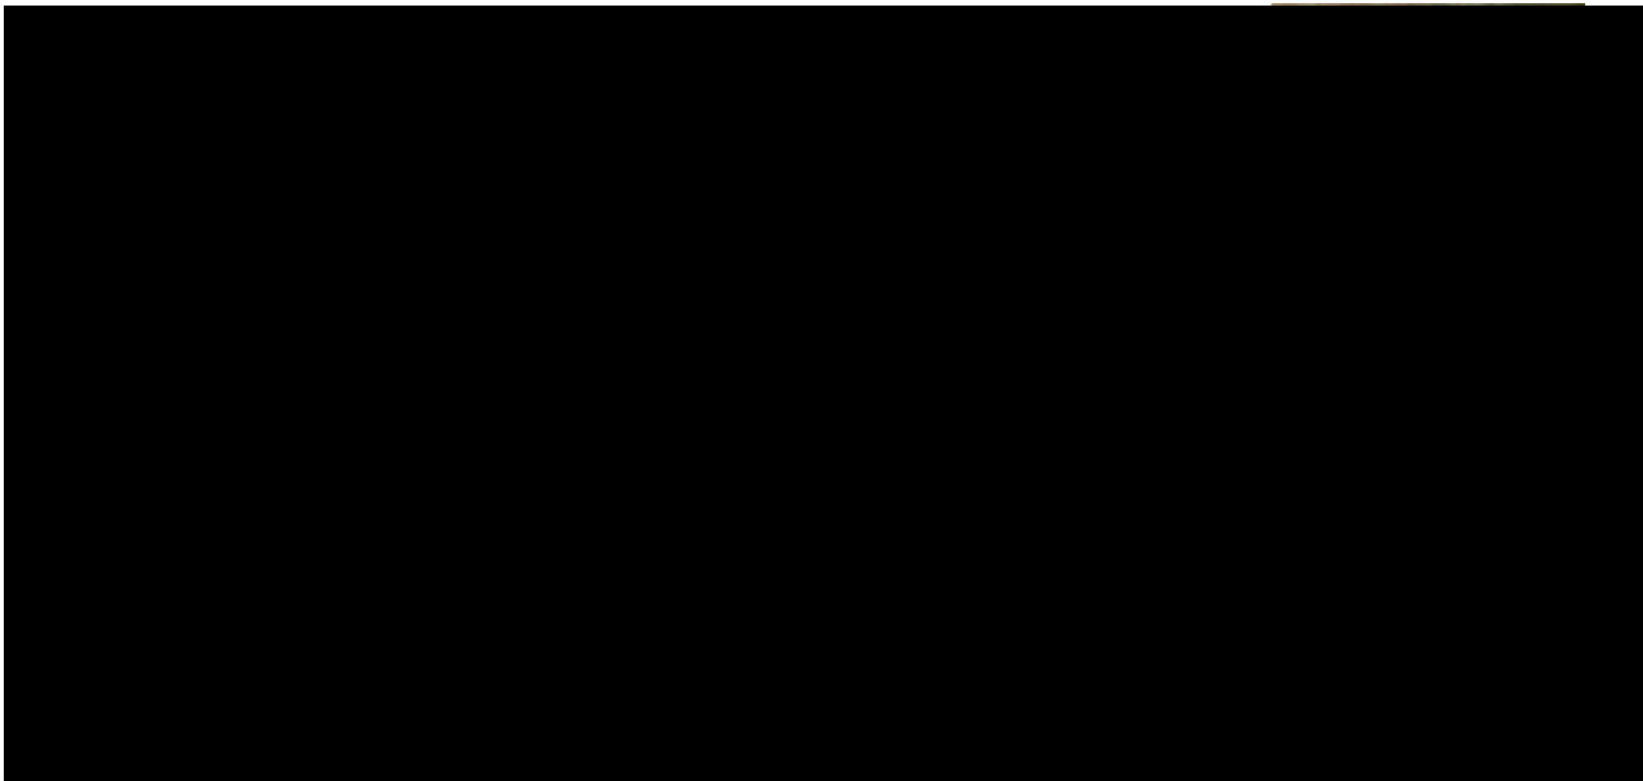

# Don't forget the PORC

In the excitement of introducing SPC and putting control limits on your charts don't lose sight of the utility and accessibility of the 'Plain Ole Run Chart' (PORC)

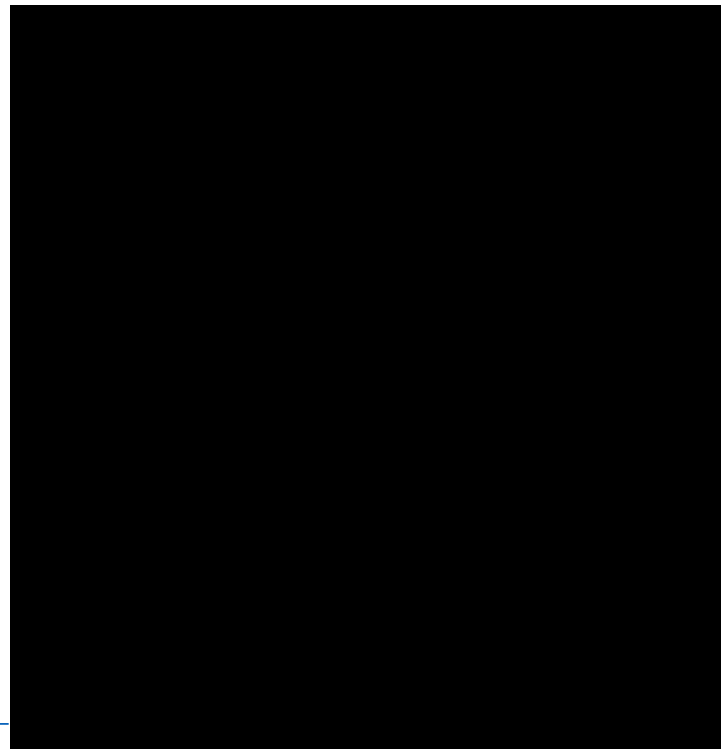

# Top table exclusive

The top table at the feast always used to get the best food. Are SPC and Run Charts seen as rich fare only for the nobs on the top table? Are they routinely used in the front-line?

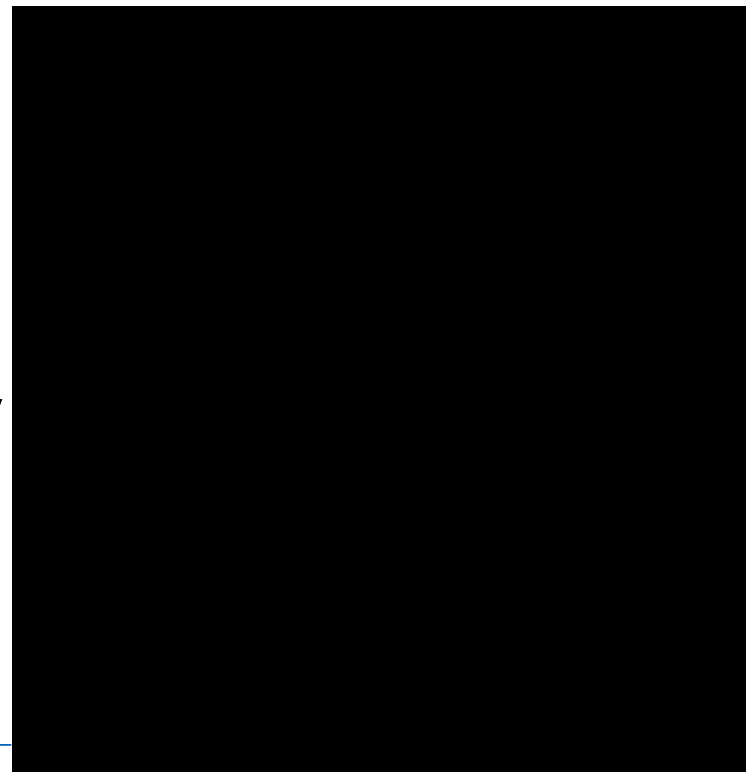

# New hammer syndrome

To someone with a new hammer everything looks like a nail! Not everything is appropriate for SPC or a Run Chart

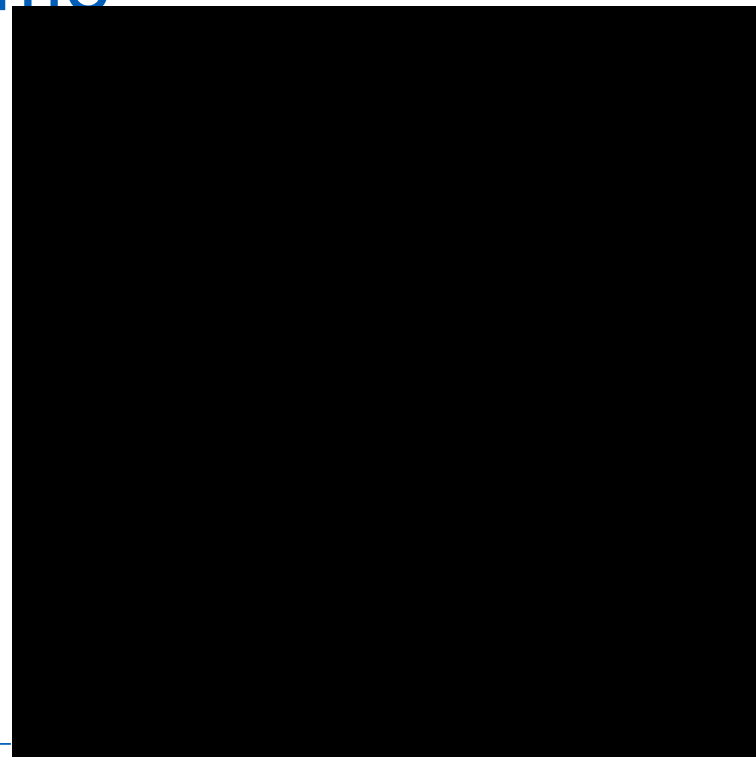

# Cargo Cults

Measure it and something will happen. More about Cargo Cults here:

[https://en.wikipedia.org/wiki/Cargo\\_cult](https://en.wikipedia.org/wiki/Cargo_cult)

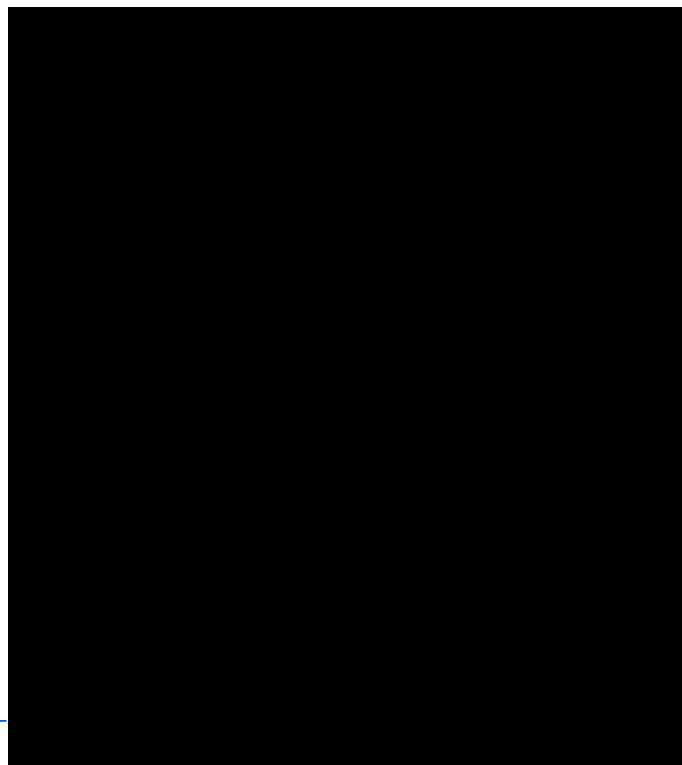

# Cargo cults – an example

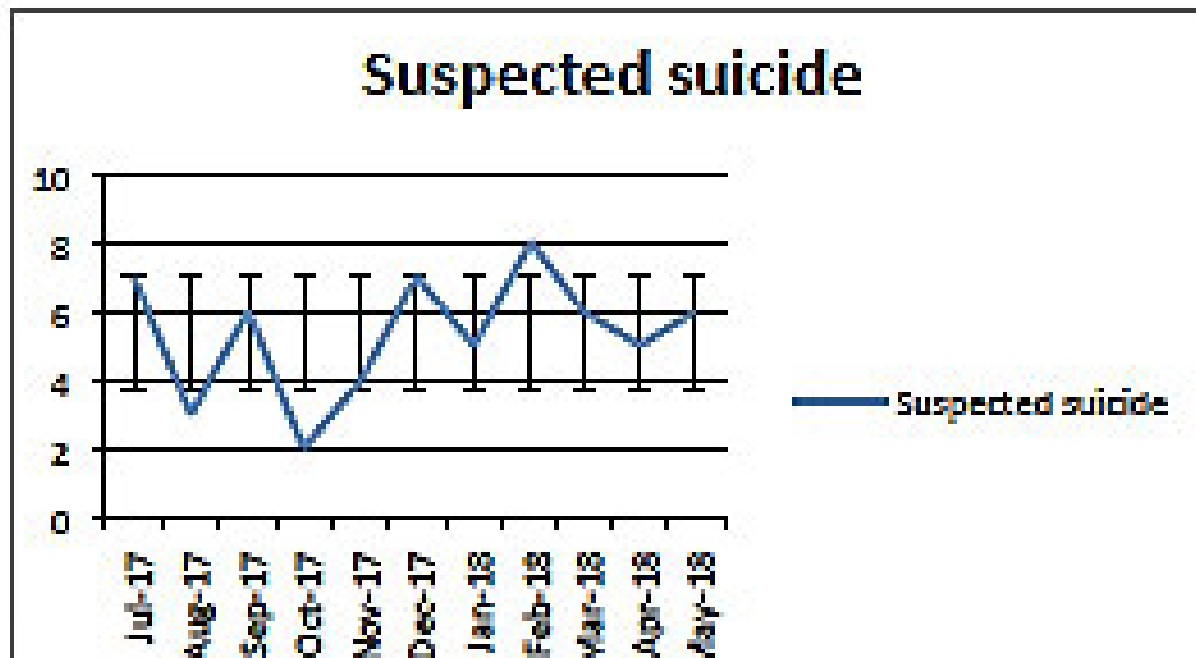

# Where's Wally?

Just how many charts can you cram onto an A4 page? If you cannot even read the legend without a magnifying glass then what is the point? How do you identify the chart(s) that indicate significant change in that crowd?

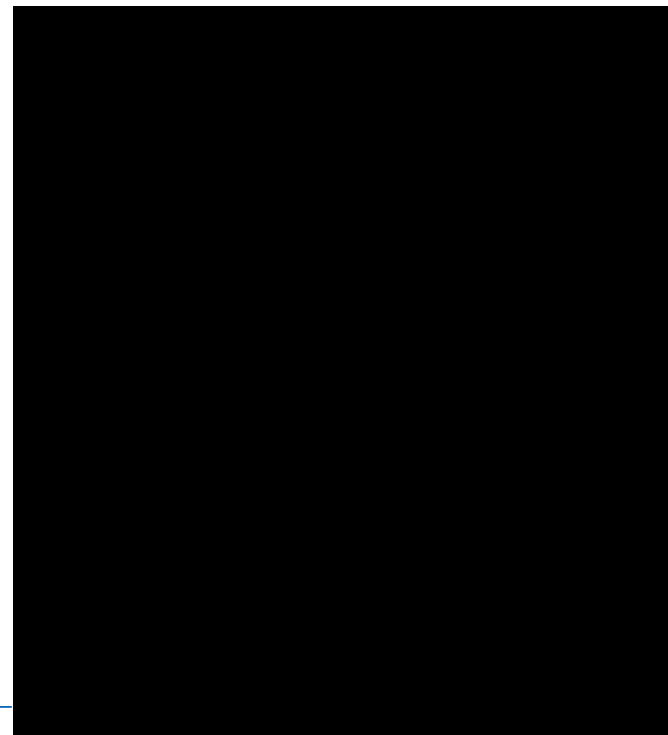

# How many angels on the head of the SPC pin?

Watch the newly minted SPC experts start to argue about how many points constitute a shift, a trend, a run – how many points to calculate control limits, sampling etc

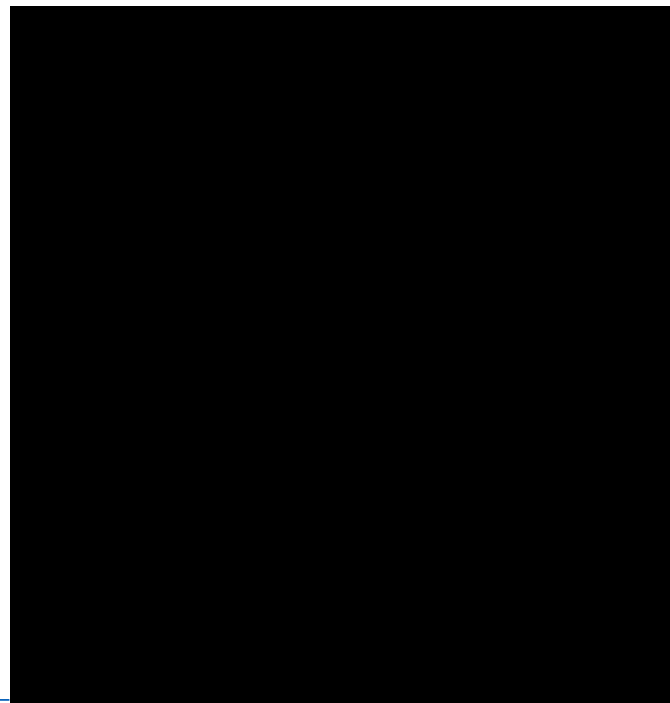

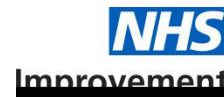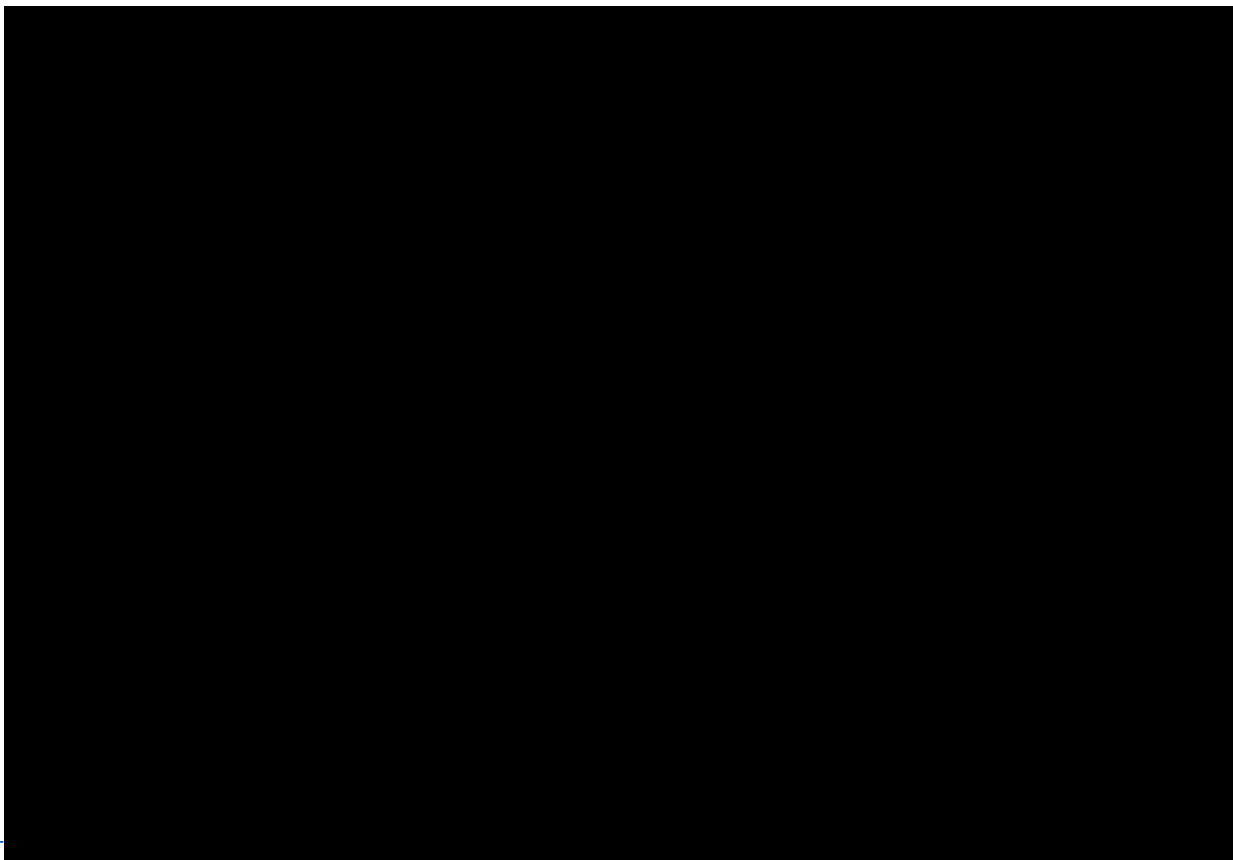

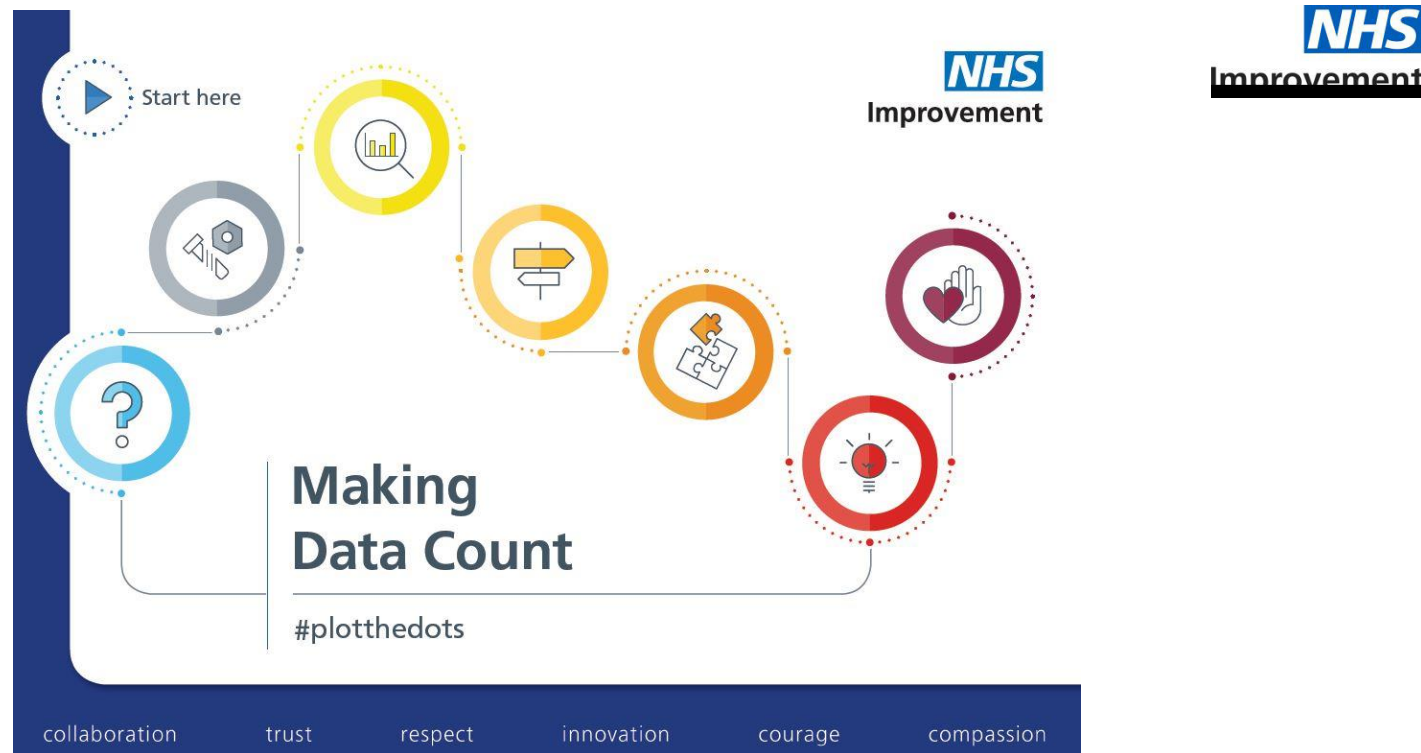

[https://improvement.nhs.uk/documents/2748/NHS\\_MAKING\\_DATA\\_COUNT\\_FINAL.pdf](https://improvement.nhs.uk/documents/2748/NHS_MAKING_DATA_COUNT_FINAL.pdf)

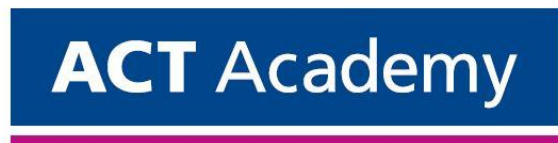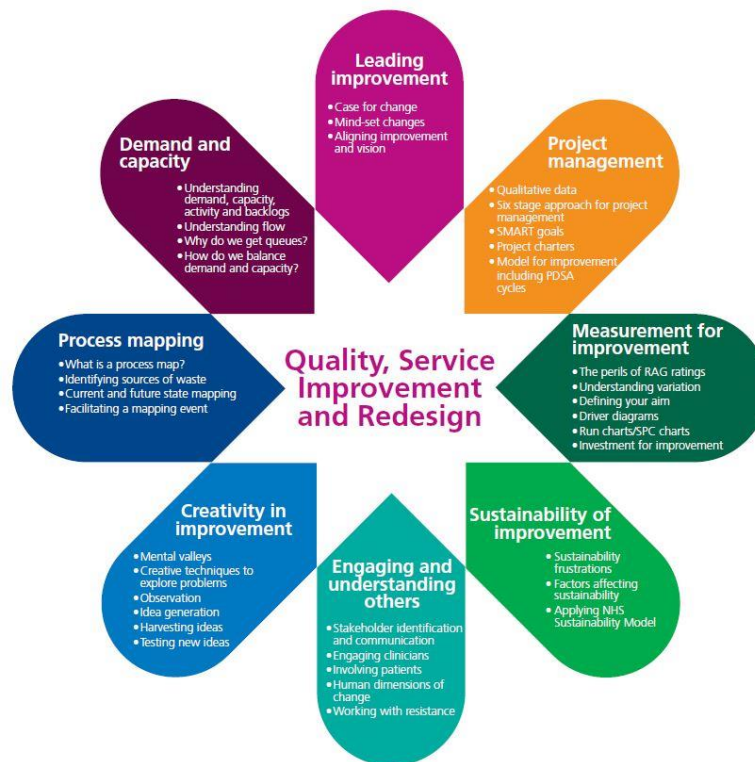

<https://improvement.nhs.uk/documents/1241/QSIR-A5-4pp.pdf>



## Poll 3

Which statement best describes how you feel about your performance report:

- I am confident that my report supports effective decision making
- I am concerned that my report may not focus discussion on the most important issues
- I need time to reflect on today's session

collaboration

trust

respect

innovation

courage

compassion



## Poll 4

Please rank the following in order of priority – which of these will be most helpful?

- Test a different approach to regulation
- Implement a regional train the trainer programme
- Establish regional networks
- Facilitate mechanisms to share learning
- Providing analytical products to aid decision making

collaboration

trust

respect

innovation

courage

compassion

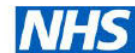

Improvement

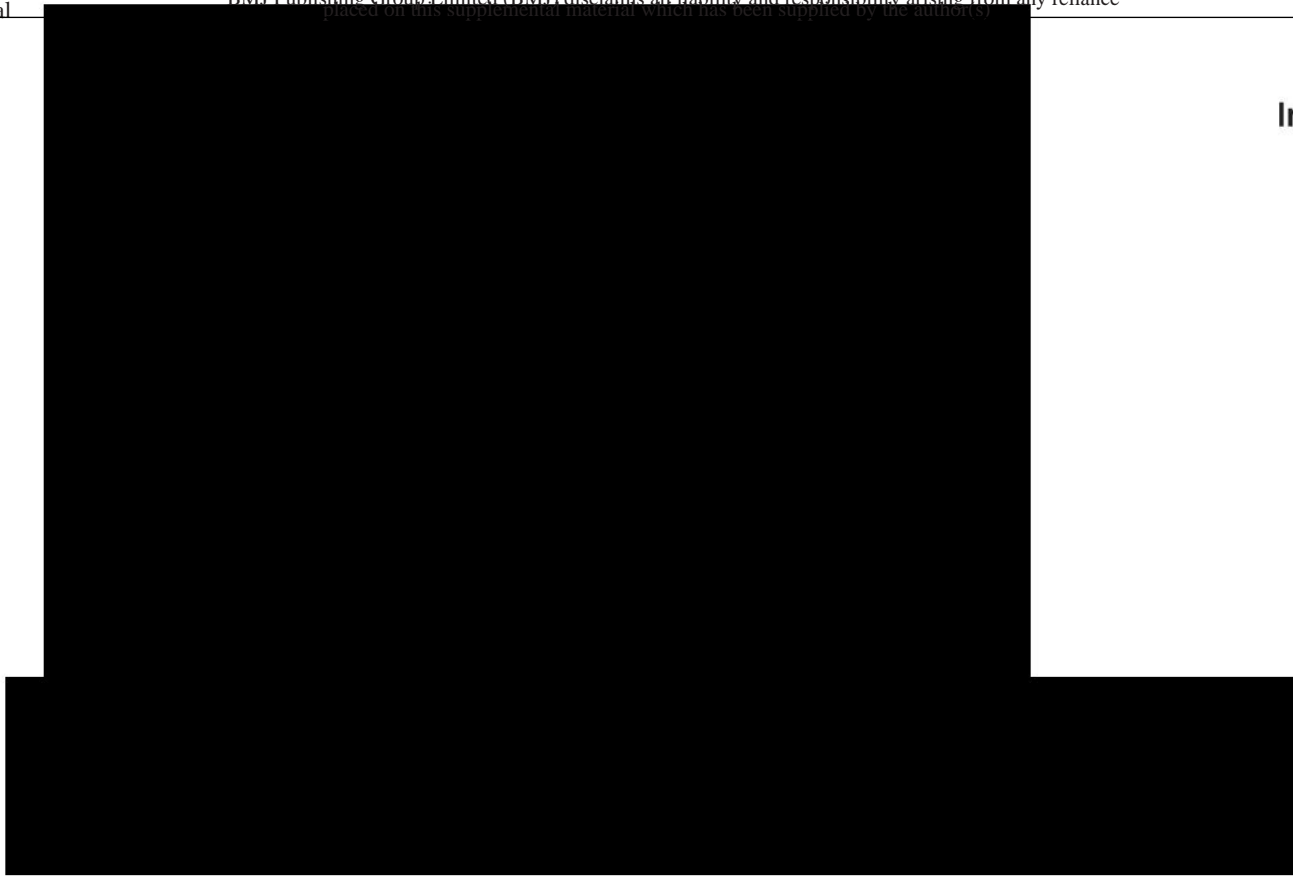

Supplement: bmjqs-2021-013514supp005_data_supplement.pdf [file bmjqs-2021-013514supp005_data_supplement.pdf]
